# Supplementary material for: Is Colobus guereza gallarum a valid endemic Ethiopian taxon?
Source: Copernicus journal article supplement (doi:10.5194/pb-6-7-2019), 2019-04-18
Supplement: Supplementary file [file pb-6-7-2019-supplement.pdf]

Supplement of Primate Biol., 6, 7–16, 2019  
<https://doi.org/10.5194/pb-6-7-2019-supplement>  
© Author(s) 2019. This work is distributed under  
the Creative Commons Attribution 4.0 License.

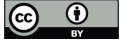

*Supplement of*

## **Is *Colobus guereza gallarum* a valid endemic Ethiopian taxon?**

**Dietmar Zinner et al.**

*Correspondence to:* Dietmar Zinner (dzinner@dpz.eu)

The copyright of individual parts of the supplement might differ from the CC BY 4.0 License.

Supplement Material

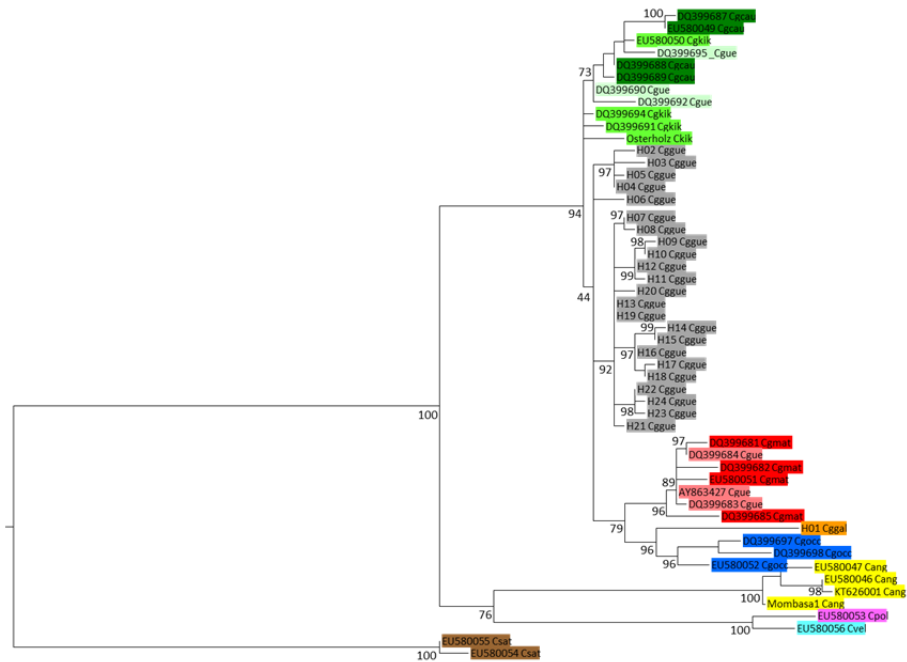

**Figure S1a.** ML tree (NADH). Csat = *Colobus satanas*, Cvel = *C. vellerosus*, Cpol = *C. polykomos*, Cang = *C. angolensis*, Cgocc = *C. guereza occidentalis*, Cggal = *C. g. gallarum*, Cgmat = *C. g. matschiei*, Cggue = *C. g. guereza*, Cgkik = *C. g. kikuyuensis*, Cgcau = *C. g. caudatus*, Cgue = *C. guereza* ssp.. Node labels refer to ML BS values.

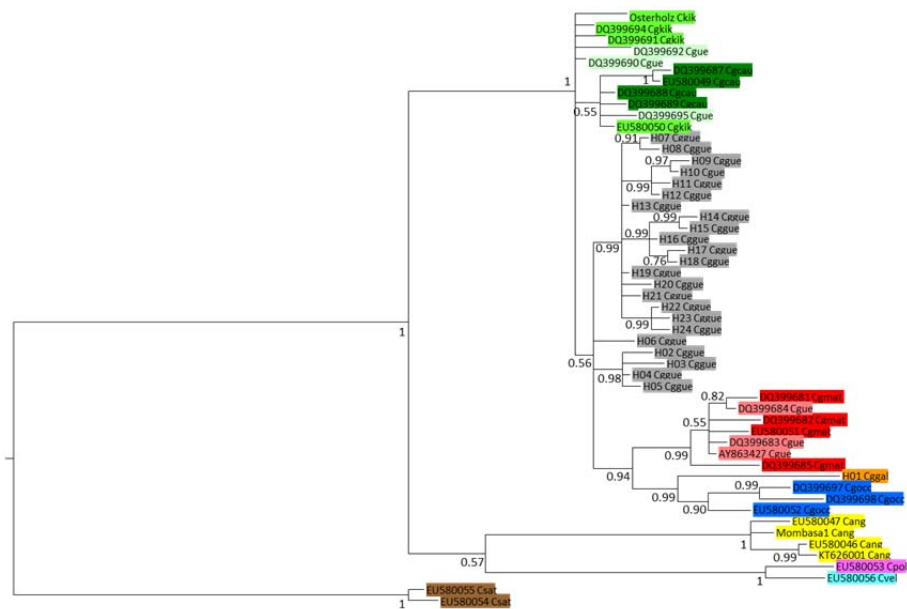

**Figure S1b.** Bayesian tree (NADH). Csat = *Colobus satanas*, Cvel = *C. vellerosus*, Cpol = *C. polykomos*, Cang = *C. angolensis*, Cgocc = *C. guereza occidentalis*, Cggal = *C. g. gallarum*, Cgmat = *C. g. matschiei*, Cggue = *C. g. guereza*, Cgkik = *C. g. kikuyuensis*, Cgcau = *C. g. caudatus*, Cgue = *C. guereza* ssp.. Node labels refer to Bayesian PPs.

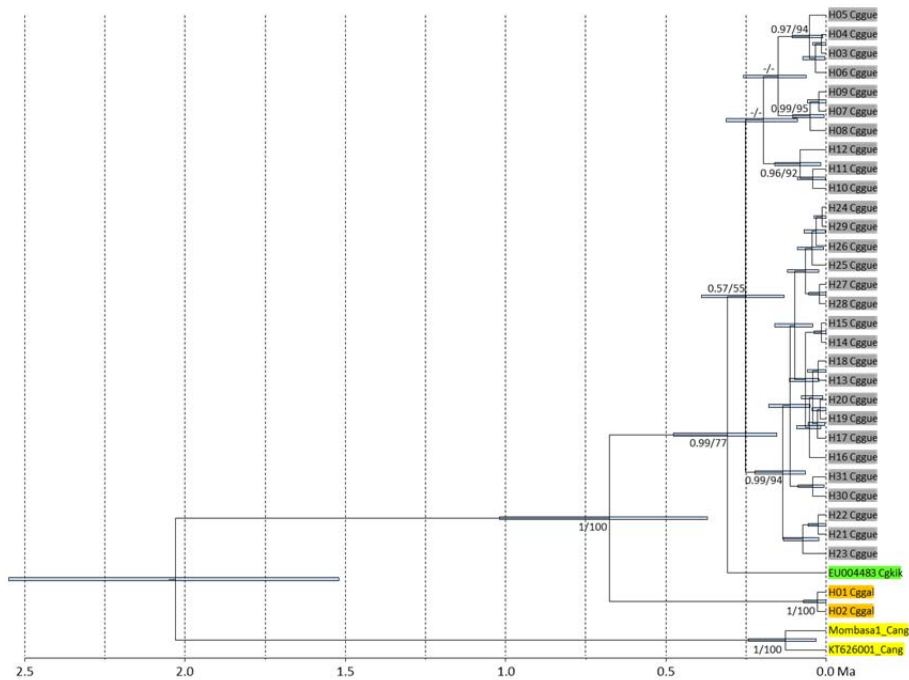

**Figure S2a.** Ultrametric tree showing phylogenetic relationships and divergence times of *Colobus* mtDNA lineages (based on 1140 bp of *cytb*). Tip labels refer to *Colobus* haplotypes (see Table S1). Cang = *C. angolensis*, Cggal = *C. g. gallarum*, Cggue = *C. g. guereza*, Cgkik = *C. g. kikuyuensis*. Node labels refer to ML BS and Bayesian PP values. The time scale below the tree indicates million years ago.

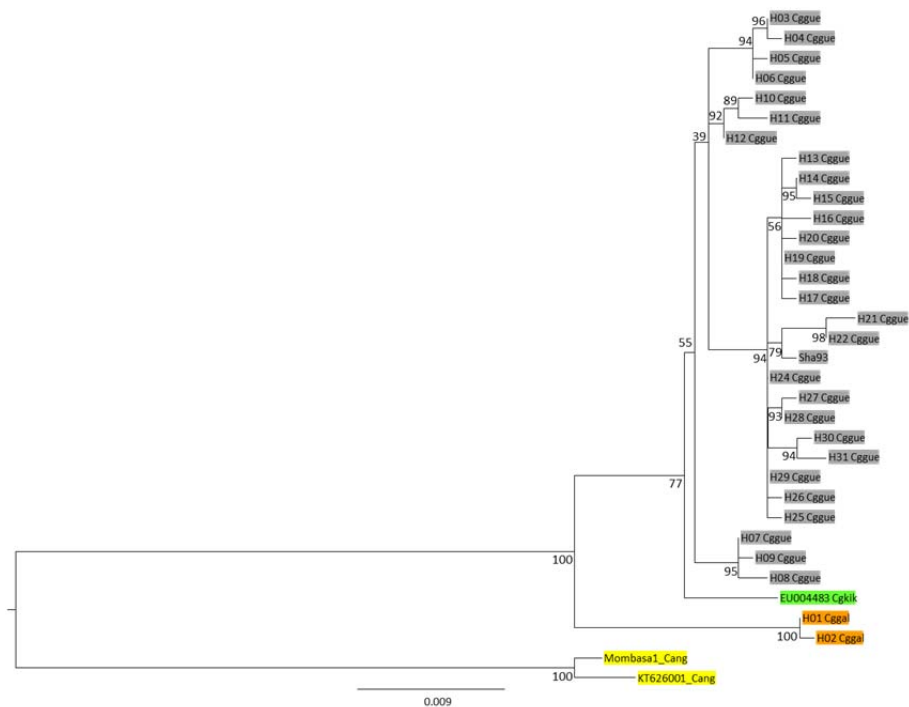

**Figure S2b.** ML tree (*cytb*). Csat = *Colobus satanas*, Cvel = *C. vellerosus*, Cpol = *C. polykomos*, Cang = *C. angolensis*, Cgocc = *C. guereza occidentalis*, Cggal = *C. g. gallarum*, Cgmat = *C. g. matschiei*, Cggue = *C. g. guereza*, Cgkik = *C. g. kikuyuensis*, Cgcau = *C. g. caudatus*, Cgue = *C. guereza* ssp.. Node labels refer to ML BS values.

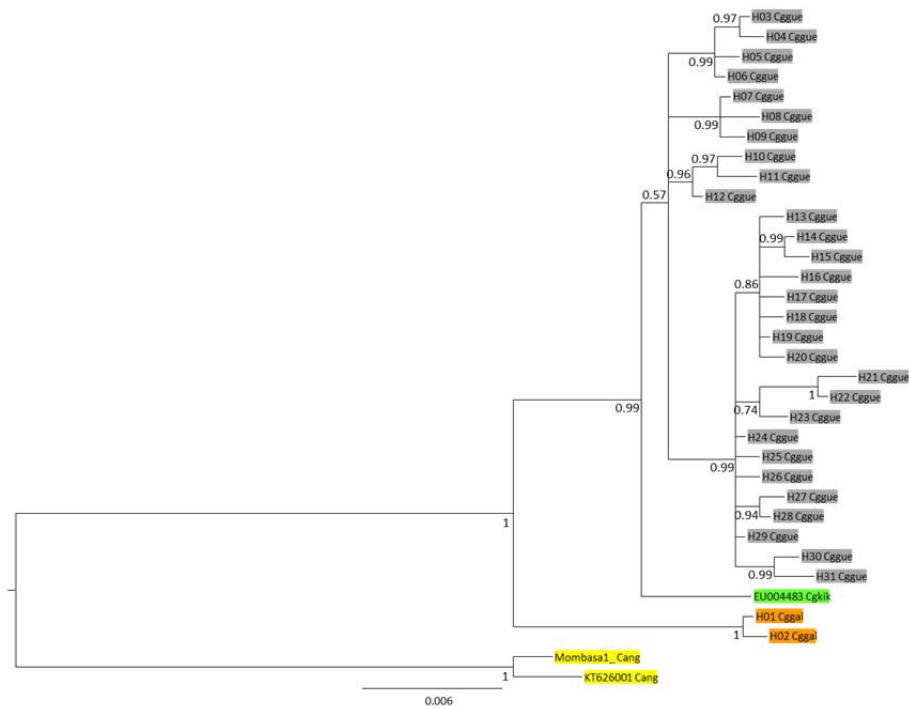

**Figure S2c.** Bayesian tree (cytb). Csat = *Colobus satanas*, Cvel = *C. vellerosus*, Cpol = *C. polykomos*, Cang = *C. angolensis*, Cgocc = *C. guereza occidentalis*, Cggal = *C. g. gallarum*, Cgmat = *C. g. matschiei*, Cggue = *C. g. guereza*, Cgkik = *C. g. kikuyuensis*, Cgcau = *C. g. caudatus*, Cgue = *C. guereza* ssp.. Node labels refer to Bayesian PPs.

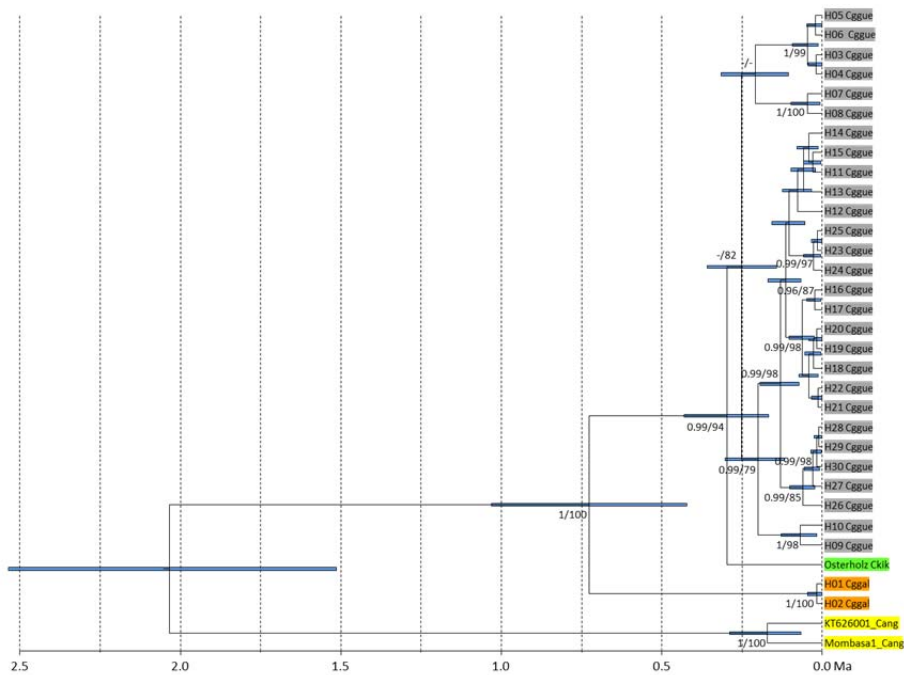

**Figure S3a.** Ultrametric tree showing phylogenetic relationships and divergence times of *Colobus* mtDNA lineages (based on concatenated 1930 bp of NADH and cytb). Tip labels refer to *Colobus* haplotypes (see Table S1). Cang = *C. angolensis*, Cggal = *C. g. gallarum*, Cggue = *C. g. guereza*, Cgkik = *C. g. kikuyuensis*. Node labels refer to ML BS and Bayesian PP values. The time scale below the tree indicates million years ago.

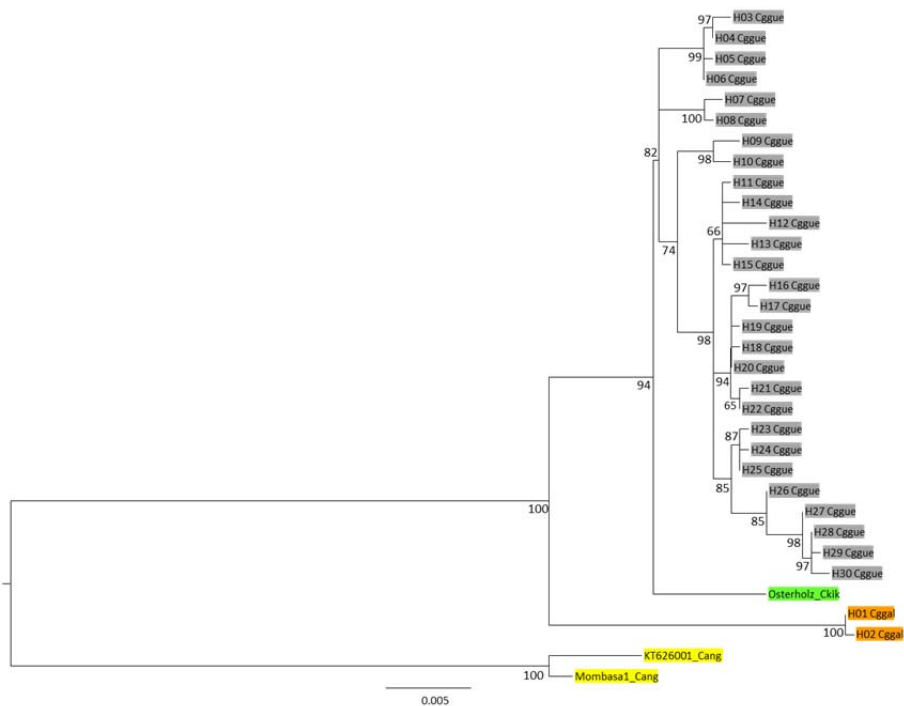

**Figure S3b.** ML tree (concatenated). Csat = *Colobus satanas*, Cvel = *C. vellerosus*, Cpol = *C. polykomos*, Cang = *C. angolensis*, Cgocc = *C. guereza occidentalis*, Cggal = *C. g. gallarum*, Cgmat = *C. g. matschiei*, Cggue = *C. g. guereza*, Cgkik = *C. g. kikuyuensis*, Cgcga = *C. g. caudatus*, Cgue = *C. guereza* ssp.. Node labels refer to ML BS values.

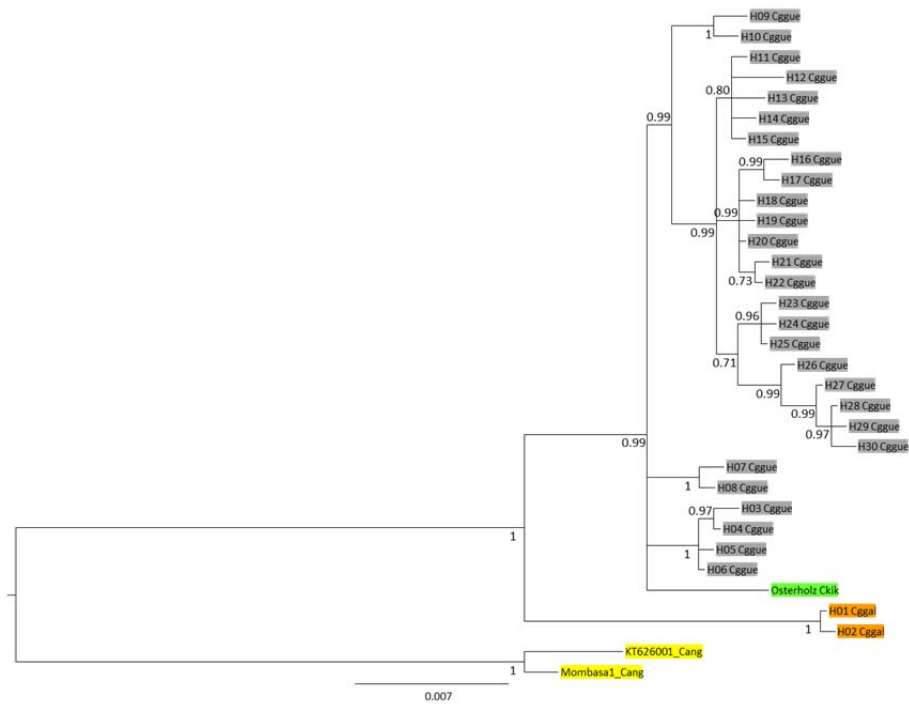

**Figure S3c.** Bayesian tree (concatenated). Csat = *Colobus satanas*, Cvel = *C. vellerosus*, Cpol = *C. polykomos*, Cang = *C. angolensis*, Cgocc = *C. guereza occidentalis*, Cggal = *C. g. gallarum*, Cgmat = *C. g. matschiei*, Cggue = *C. g. guereza*, Cgkik = *C. g. kikuyuensis*, Cgcau = *C. g. caudatus*, Cgue = *C. guereza* ssp.. Node labels refer to Bayesian PPs.

**Table S1.** Taxonomy, geographical origin (coordinates in decimal degrees) and haplotype assignments of *Colobus* samples and respective NCBI Accession numbers per haplotype.

| taxon                      | ID        | Country | Site                      | Lat     | Long    | NADH hap | Acc Num  | cytb hap | Acc Num  | comb hap |
|----------------------------|-----------|---------|---------------------------|---------|---------|----------|----------|----------|----------|----------|
| <i>C. satanas</i>          |           | GNQ     | Bioko Island              |         |         | og       | EU580054 |          |          |          |
| <i>C. satanas</i>          |           | GNQ     | Bioko Island              |         |         | og       | EU580055 |          |          |          |
| <i>C. vellerosus</i>       |           | GHA     | Boabeng-Fiema             |         |         | og       | EU580056 |          |          |          |
| <i>C. polykomos</i>        |           | CIV     | Tai National Park         |         |         | og       | EU580053 |          |          |          |
| <i>C. angolensis</i>       | Mombasa1  | KEN     | s of Mombasa              | -4.3353 | 39.5689 | og       | MK415322 | og1      | MK415348 | og1      |
| <i>C. angolensis</i>       |           | KEN     |                           |         |         |          |          | og1      | HQ859372 |          |
| <i>C. angolensis</i>       |           |         | zoo, <i>palliatus</i> ?   |         |         | og       | EU580047 |          |          |          |
| <i>C. angolensis</i>       |           |         | unknown, zoo              |         |         | og       | EU580046 |          |          |          |
| <i>C. angolensis</i>       |           |         | <i>palliatus</i> ?        |         |         | og       | KT626001 | og2      | KT626001 | og2      |
| <i>C. angolensis</i>       |           | KEN     |                           |         |         |          |          | og2      | HQ859342 |          |
| <i>C. g. matschiei</i> ?   |           |         |                           |         |         |          | AY863427 |          |          |          |
| <i>C. g. matschiei</i>     |           | KEN     | Kakamega Forest           |         |         |          | EU580051 |          |          |          |
| <i>C. g. matschiei</i>     |           |         | zoo?                      |         |         |          | DQ399681 |          |          |          |
| <i>C. g. matschiei</i>     |           |         | zoo?                      |         |         |          | DQ399682 |          |          |          |
| <i>C. g. matschiei</i>     |           |         | zoo?                      |         |         |          | DQ399685 |          |          |          |
| <i>C. g. matschiei</i> ?   |           |         | zoo?                      |         |         |          | DQ399683 |          |          |          |
| <i>C. g. matschiei</i> ?   |           |         | zoo?                      |         |         |          | DQ399684 |          |          |          |
| <i>C. g. occidentalis</i>  |           |         | zoo?                      |         |         |          | DQ399697 |          |          |          |
| <i>C. g. occidentalis</i>  |           |         | zoo?                      |         |         |          | DQ399698 |          |          |          |
| <i>C. g. occidentalis</i>  |           | CMR     | unknown locality          |         |         |          | EU580052 |          |          |          |
| <i>C. g. caudatus</i> ?    |           |         | zoo, <i>caudatus</i> ?    |         |         |          | EU580049 |          |          |          |
| <i>C. g. caudatus</i> ?    |           |         | zoo?                      |         |         |          | DQ399690 |          |          |          |
| <i>C. g. caudatus</i> ?    |           |         | zoo?                      |         |         |          | DQ399692 |          |          |          |
| <i>C. g. caudatus</i> ?    |           |         | zoo?                      |         |         |          | DQ399695 |          |          |          |
| <i>C. g. caudatus</i>      |           |         | zoo?                      |         |         |          | DQ399687 |          |          |          |
| <i>C. g. caudatus</i>      |           |         | zoo?                      |         |         |          | DQ399688 |          |          |          |
| <i>C. g. caudatus</i>      |           |         | zoo?                      |         |         |          | DQ399689 |          |          |          |
| <i>C. g. kikuyuensis</i> ? |           |         | zoo, <i>kikuyuensis</i> ? |         |         |          | EU580050 |          |          |          |
| <i>C. g. kikuyuensis</i>   |           |         | zoo?                      |         |         |          | DQ399691 |          |          |          |
| <i>C. g. kikuyuensis</i>   |           |         | zoo?                      |         |         |          | DQ399694 |          |          |          |
| <i>C. g. kikuyuensis</i>   | Osterholz |         | zoo, <i>kikuyuensis</i> ? |         |         |          | MK415323 |          | EU004483 | og       |
| <i>C. g. gallarum</i>      | ID1       | ETH     | Adas Mts Forest           | 9.3087  | 41.2449 | h01      | MK415324 | h01      | MK415349 | h01      |
| <i>C. g. gallarum</i>      | ID2       | ETH     | Adas Mts Forest           | 9.3098  | 41.2453 | h01      |          | h01      |          | h01      |

|                       |           |     |                    |         |         |     |          |     |          |     |
|-----------------------|-----------|-----|--------------------|---------|---------|-----|----------|-----|----------|-----|
| <i>C. g. gallarum</i> | ID3       | ETH | Adas Mts Forest    | 9.3106  | 41.2453 | h01 |          | h02 | MK415350 | h02 |
| <i>C. g. gallarum</i> | ID4       | ETH | Adas Mts Forest    | 9.3106  | 41.2453 | h01 |          | h01 |          | h01 |
| <i>C. g. gallarum</i> | C1        | ETH | Kuni-Muktart       | 9.0208  | 40.8402 | h01 |          | h01 |          | h01 |
| <i>C. g. gallarum</i> | C2        | ETH | Kuni-Muktart       | 9.0258  | 40.8567 | h01 |          | h01 |          | h01 |
| <i>C. g. gallarum</i> | C3        | ETH | Kuni-Muktart       | 9.0291  | 40.8424 | h01 |          |     |          |     |
| <i>C. g. gallarum</i> | C4        | ETH | Kuni-Muktart       | 9.0292  | 40.8550 | h01 |          | h01 |          | h01 |
| <i>C. g. gallarum</i> | C5        | ETH | Kuni-Muktart       | 9.0106  | 40.8476 | h01 |          | h01 |          | h01 |
| <i>C. g. gallarum</i> | C6        | ETH | Kuni-Muktart       | 9.0172  | 40.8303 | h01 |          | h01 |          | h01 |
| <i>C. g. guereza</i>  | Ars07     | ETH | Arussi             | 7.9853  | 39.6784 | h02 | MK415325 | h03 | MK415351 | h03 |
| <i>C. g. guereza</i>  | Ars12     | ETH | Arussi             | 7.9853  | 39.6784 | h02 |          | h03 |          | h03 |
| <i>C. g. guereza</i>  | SH17      | ETH | Kama1              | 7.3172  | 36.0702 | h03 | MK415326 |     |          |     |
| <i>C. g. guereza</i>  | Ars04     | ETH | Arussi             | 7.9853  | 39.6784 | h04 | MK415327 | h05 | MK415353 | h05 |
| <i>C. g. guereza</i>  | Bns01     | ETH | Benessa            | 6.3121  | 38.5000 | h04 |          | h03 |          | h04 |
| <i>C. g. guereza</i>  | Bns08     | ETH | Benessa            | 6.3121  | 38.5000 | h04 |          |     |          |     |
| <i>C. g. guereza</i>  | SH27      | ETH | Boginda1           | 7.5256  | 36.1180 | h04 |          |     |          |     |
| <i>C. g. guereza</i>  | SH24      | ETH | Kama1              | 7.3171  | 36.0704 | h04 |          |     |          |     |
| <i>C. g. guereza</i>  | Wondo26   | ETH | Wondo Genet        | 7.0209  | 38.6362 | h04 |          | h06 | MK415354 | h06 |
| <i>C. g. guereza</i>  | Wondo31   | ETH | Wondo Genet        | 7.0209  | 38.6362 | h04 |          | h06 |          | h06 |
| <i>C. g. guereza</i>  | SH31      | ETH | Yayoo              | 8.2895  | 35.6091 | h04 |          |     |          |     |
| <i>C. g. guereza</i>  | SH02      | ETH | Boginda2           | 7.5094  | 36.1302 | h05 | MK415328 |     |          |     |
| <i>C. g. guereza</i>  | SH13      | ETH | Boginda2           | 7.5114  | 36.1217 | h05 |          |     |          |     |
| <i>C. g. guereza</i>  | SH07      | ETH | Kayakela1          | 7.3202  | 36.2224 | h06 | MK415329 | h11 | MK415359 | h07 |
| <i>C. g. guereza</i>  | Sha94     | ETH | Shako, Bemch Maji  | 6.5000  | 35.0000 | h06 |          | h10 | MK415358 | h08 |
| <i>C. g. guereza</i>  | SH_ManII  | ETH | Managesha II       | 8.9668  | 38.5455 | h07 | MK415330 |     |          |     |
| <i>C. g. guereza</i>  | SH_ManIII | ETH | Managesha III      | 8.9668  | 38.5455 | h07 |          |     |          |     |
| <i>C. g. guereza</i>  | Bure25    | ETH | Bure/Agew Mider    | 11.0180 | 36.7628 | h08 | MK415331 | h18 | MK415366 | h13 |
| <i>C. g. guereza</i>  | Har06     | ETH | Harena             | 6.6827  | 39.8366 | h09 | MK415332 | h22 | MK415370 | h29 |
| <i>C. g. guereza</i>  | Har07     | ETH | Harena             | 6.6827  | 39.8366 | h09 |          | h22 |          | h29 |
| <i>C. g. guereza</i>  | Yir09     | ETH | Yirgalem           | 9.7213  | 37.5724 | h10 | MK415333 | h21 | MK415369 | h30 |
| <i>C. g. guereza</i>  | Bns02     | ETH | Benessa            | 6.3121  | 38.5000 | h10 |          | h22 |          | h28 |
| <i>C. g. guereza</i>  | Dale02    | ETH | Dale Woreda, Kaffa | 6.4499  | 38.2220 | h10 |          | h22 |          | h28 |
| <i>C. g. guereza</i>  | SH36      | ETH | Harena 1           | 6.7476  | 39.7139 | h10 |          |     |          |     |
| <i>C. g. guereza</i>  | Yir12     | ETH | Yirgalem           | 9.7213  | 37.5724 | h10 |          | h21 |          | h30 |
| <i>C. g. guereza</i>  | Jma06     | ETH | Jimma              | 7.6679  | 36.8861 | h11 | MK415334 | h07 | MK415355 | h09 |
| <i>C. g. guereza</i>  | Jma67     | ETH | Jimma              | 7.6679  | 36.8861 | h11 |          | h07 |          | h09 |
| <i>C. g. guereza</i>  | Jma91     | ETH | Jimma              | 7.6679  | 36.8861 | h11 |          | h07 |          | h09 |
| <i>C. g. guereza</i>  | SH11      | ETH | Boginda2           | 7.5117  | 36.1211 | h12 | MK415335 | h22 |          | h27 |



|                      |            |     |                 |         |         |     |          |     |          |     |
|----------------------|------------|-----|-----------------|---------|---------|-----|----------|-----|----------|-----|
| <i>C. g. guereza</i> | SH12       | ETH | Boginda2        | 7.5112  | 36.1213 | h12 |          | h22 |          | h27 |
| <i>C. g. guereza</i> | SH18       | ETH | Kama2           | 7.3193  | 36.0870 | h13 | MK415336 |     |          |     |
| <i>C. g. guereza</i> | SH21       | ETH | Kama1           | 7.3110  | 36.0752 | h14 | MK415337 |     |          |     |
| <i>C. g. guereza</i> | SH08       | ETH | Kayakela2       | 7.3233  | 36.2153 | h15 | MK415338 |     |          |     |
| <i>C. g. guereza</i> | SH03       | ETH | Boginda2        | 7.5128  | 36.1206 | h16 | MK415339 | h26 | MK415374 | h18 |
| <i>C. g. guereza</i> | Bure28     | ETH | Bure/Agew Mider | 11.0180 | 36.7628 | h16 |          | h31 | MK415379 | h16 |
| <i>C. g. guereza</i> | Bure32     | ETH | Bure/Agew Mider | 11.0180 | 36.7628 | h16 |          | h31 |          | h16 |
| <i>C. g. guereza</i> | Bure35     | ETH | Bure/Agew Mider | 11.0180 | 36.7628 | h16 |          | h31 |          | h16 |
| <i>C. g. guereza</i> | Bure37     | ETH | Bure/Agew Mider | 11.0180 | 36.7628 | h16 |          | h31 |          | h16 |
| <i>C. g. guereza</i> | Din1a      | ETH | Dinibira, Kaffa | 6.1500  | 37.3400 | h16 |          | h24 | MK415372 | h20 |
| <i>C. g. guereza</i> | Din1b      | ETH | Dinibira, Kaffa | 6.1500  | 37.3400 | h16 |          | h30 | MK415378 | h17 |
| <i>C. g. guereza</i> | SH22       | ETH | Kama1           | 7.3145  | 36.0727 | h16 |          | h25 | MK415373 | h19 |
| <i>C. g. guereza</i> | SH25       | ETH | Kayakela2       | 7.3217  | 36.2138 | h16 |          | h26 |          | h18 |
| <i>C. g. guereza</i> | SH32       | ETH | Yayoo           | 8.2895  | 35.6091 | h17 | MK415340 | h29 | MK415377 | h21 |
| <i>C. g. guereza</i> | Bale01     | ETH | Bale Mts        | 7.2200  | 39.7175 | h18 | MK415341 | h24 |          | h22 |
| <i>C. g. guereza</i> | Bale02     | ETH | Bale Mts        | 7.2200  | 39.7175 | h18 |          | h24 |          | h22 |
| <i>C. g. guereza</i> | SH04       | ETH | Boginda1        | 7.5170  | 36.1196 | h18 |          | h24 |          | h22 |
| <i>C. g. guereza</i> | WG06       | ETH | West Gojam      | 11.3716 | 37.2656 | h19 | MK415342 | h13 | MK415361 | h15 |
| <i>C. g. guereza</i> | Woch02     | ETH | Wochalle, Wollo | 11.0251 | 39.6839 | h19 |          | h17 | MK415365 | h11 |
| <i>C. g. guereza</i> | Woch33     | ETH | Wochalle, Wollo | 11.0251 | 39.6839 | h19 |          | h17 |          | h11 |
| <i>C. g. guereza</i> | Woch50     | ETH | Wochalle, Wollo | 11.0251 | 39.6839 | h19 |          | h17 |          | h11 |
| <i>C. g. guereza</i> | SH_WolIIIA | ETH | Woliso          | 8.5348  | 37.9810 | h19 |          |     |          |     |
| <i>C. g. guereza</i> | SH_WolIIIB | ETH | Woliso          | 8.5348  | 37.9810 | h19 |          |     |          |     |
| <i>C. g. guereza</i> | SH33       | ETH | Bale Mts        | 7.0443  | 39.5463 | h20 | MK415343 | h16 | MK415364 | h12 |
| <i>C. g. guereza</i> | SH34       | ETH | Bale Mts        | 7.0443  | 39.5463 | h20 |          | h16 |          | h12 |
| <i>C. g. guereza</i> | Bed35      | ETH | Bedelle         | 8.4592  | 36.3618 | h21 | MK415344 | h14 | MK415362 | h14 |
| <i>C. g. guereza</i> | Bed48      | ETH | Bedelle         | 8.4592  | 36.3618 | h21 |          | h14 |          | h14 |
| <i>C. g. guereza</i> | Bure48     | ETH | Bure/Agew Mider | 11.0180 | 36.7628 | h21 |          |     |          |     |
| <i>C. g. guereza</i> | Jma01      | ETH | Jimma           | 7.6679  | 36.8861 | h21 |          | h09 | MK415357 | h10 |
| <i>C. g. guereza</i> | SH05       | ETH | Kama1           | 7.3178  | 36.0695 | h22 | MK415345 | h28 | MK415376 | h25 |
| <i>C. g. guereza</i> | SH10       | ETH | Boginda1        | 7.5331  | 36.1210 | h22 |          | h27 | MK415375 | h23 |
| <i>C. g. guereza</i> | SH15       | ETH | Boginda1        | 7.5301  | 36.1208 | h22 |          | h27 |          | h23 |
| <i>C. g. guereza</i> | Illi01     | ETH | Illibabour      | 8.4879  | 35.6992 | h22 |          | h27 |          | h26 |
| <i>C. g. guereza</i> | Bed40      | ETH | Bedelle         | 8.4592  | 36.3618 | h23 | MK415346 |     |          |     |
| <i>C. g. guereza</i> | SHBab      | ETH | Boginda1        | 7.5331  | 36.1210 | h24 | MK415347 | h28 |          | h24 |
| <i>C. g. guereza</i> | Ars11      | ETH | Arussi          | 7.9853  | 39.6784 |     |          | h04 | MK415352 |     |
| <i>C. g. guereza</i> | Ars09      | ETH | Arussi          | 7.9853  | 39.6784 |     |          | h06 |          |     |

|                      |         |     |                    |         |         |  |  |     |          |  |
|----------------------|---------|-----|--------------------|---------|---------|--|--|-----|----------|--|
| <i>C. g. guereza</i> | Wondo32 | ETH | Wondo Genet        | 7.0209  | 38.6362 |  |  | h06 |          |  |
| <i>C. g. guereza</i> | SH06    | ETH | Kama2              | 7.3231  | 36.0891 |  |  | h07 |          |  |
| <i>C. g. guereza</i> | Jma02   | ETH | Jimma              | 7.6679  | 36.8861 |  |  | h08 | MK415356 |  |
| <i>C. g. guereza</i> | Gesh02  | ETH | Gesh               | 6.3689  | 35.1245 |  |  | h12 | MK415360 |  |
| <i>C. g. guereza</i> | Bed01   | ETH | Bedelle            | 8.4592  | 36.3618 |  |  | h15 | MK415363 |  |
| <i>C. g. guereza</i> | Woch92  | ETH | Wochalle, Wollo    | 11.0251 | 39.6839 |  |  | h17 |          |  |
| <i>C. g. guereza</i> | Har15   | ETH | Harenna            | 6.6827  | 39.8366 |  |  | h19 | MK415367 |  |
| <i>C. g. guereza</i> | Bure47  | ETH | Bure/Agew Mider    | 11.0180 | 36.7628 |  |  | h20 | MK415368 |  |
| <i>C. g. guereza</i> | Dale01  | ETH | Dale Woreda, Kaffa | 6.4499  | 38.2220 |  |  | h22 |          |  |
| <i>C. g. guereza</i> | Har03   | ETH | Harenna            | 6.6827  | 39.8366 |  |  | h22 |          |  |
| <i>C. g. guereza</i> | Har04   | ETH | Harenna            | 6.6827  | 39.8366 |  |  | h22 |          |  |
| <i>C. g. guereza</i> | Har08   | ETH | Harenna            | 6.6827  | 39.8366 |  |  | h22 |          |  |
| <i>C. g. guereza</i> | Har13   | ETH | Harenna            | 6.6827  | 39.8366 |  |  | h22 |          |  |
| <i>C. g. guereza</i> | Har22   | ETH | Harenna            | 6.6827  | 39.8366 |  |  | h22 |          |  |
| <i>C. g. guereza</i> | Illio2  | ETH | Illibabour         | 8.4879  | 35.6992 |  |  | h27 |          |  |
| <i>C. g. guereza</i> | Jma03   | ETH | Jimma              | 7.6679  | 36.8861 |  |  | h22 |          |  |
| <i>C. g. guereza</i> | Sha92   | ETH | Shako, Bemch Maji  | 6.5000  | 35.0000 |  |  | h22 |          |  |
| <i>C. g. guereza</i> | Sha93   | ETH | Shako, Bemch Maji  | 6.5000  | 35.0000 |  |  | h23 | MK415371 |  |

CIV = Ivory Coast, CMR = Cameroon, ETH = Ethiopia, GHA = Ghana, GNQ = Equatorial Guinea, KEN = Kenya; h = haplotype, og = outgroup haplotype

**Table S2.** Primers used in this study

| <b>Primer ID</b> | <b>Sequence 5'-3'</b>       |
|------------------|-----------------------------|
| Cytb1-F          | ACC AAT GAT ATG AAA AAY CAT |
| Cytb1-R          | TGG TTG TAT AGT AGG GGT     |
| Cytb2-F          | ACA CCT ACT CTT TCT ACA     |
| Cytb2-R          | GTT TTG GGT ATT GGY GGT     |
| NADH-F           | CTA ACC CCT ACG AAT GCG G   |
| NADH-R           | CGT GAG GGA CTT TCA TTG TG  |
